# Supplementary material for: Effect of Switching to Once-Weekly Semaglutide on Non-Alcoholic Fatty Liver Disease: The SWITCH-SEMA 1 Subanalysis
Source: MDPI journal article supplement (doi:10.3390/pharmaceutics15082163), 2023-08-20
Supplement: s1 [file s1]

Table S1. Relationship between the percent changes in the fatty liver index and changes in metabolic parameters

|                    | Continue (n=27)         |                 | Switch to semaglutide (n=31) |                 |
|--------------------|-------------------------|-----------------|------------------------------|-----------------|
|                    | Correlation coefficient | <i>P</i> -value | Correlation coefficient      | <i>P</i> -value |
| ΔFPG               | 0.479                   | 0.012           | 0.123                        | 0.509           |
| ΔHbA1c             | 0.418                   | 0.030           | 0.061                        | 0.745           |
| ΔBMI               | 0.355                   | 0.070           | 0.387                        | 0.031           |
| ΔAST               | 0.351                   | 0.073           | 0.096                        | 0.606           |
| ΔALT               | 0.353                   | 0.071           | 0.046                        | 0.807           |
| ΔeGFR              | −0.024                  | 0.906           | −0.247                       | 0.180           |
| ΔTotal cholesterol | 0.253                   | 0.202           | 0.281                        | 0.126           |

ALT, alanine aminotransferase; AST, aspartate aminotransferase; BMI, body mass index; eGFR, estimated glomerular filtration rate; FPG, fasting plasma glucose; HbA1c, glycated hemoglobin.

Table S2. Comparison of changes in representative metabolic parameters between the treatment arms

|                          |          | Liraglutide (n=23)  |                       | Dulaglutide (n=35) |                           | P-value |
|--------------------------|----------|---------------------|-----------------------|--------------------|---------------------------|---------|
|                          |          | Continue (n=10)     | SWITCH (n=13)         | Continue (n=17)    | SWITCH (n=18)             |         |
| FLI                      | Baseline | 73.9 ± 22.5         | 71.2 ± 22.9           | 69.5 ± 16.2        | 66.6 ± 26.0               |         |
|                          | Changes  | -1.41 (-7.04, 4.22) | -2.09 (-8.75, 4.57)   | 2.69 (-2.05, 7.44) | -8.64 (-12.28, -5.00) *** | 0.056   |
| HbA1c (%)                | Baseline | 7.6 ± 0.7           | 8.0 ± 0.8             | 7.9 ± 1.0          | 7.9 ± 0.7                 |         |
|                          | Changes  | 0.0 (-0.3, 0.3)     | -0.8 (-1.0, -0.6) *** | 0.2 (-0.1, 0.5)    | -0.9 (-1.2, -0.5) ***     | 0.699   |
| BMI (kg/m <sup>2</sup> ) | Baseline | 32.2 ± 6.1          | 32.1 ± 6.2            | 30.0 ± 2.6         | 30.5 ± 4.9                |         |
|                          | Changes  | -0.1 (-0.5, 0.3)    | -0.8 (-1.4, -0.2) *   | 0.2 (-0.2, 0.5)    | -1.0 (-1.3, -0.7) ***     | 0.491   |

Values are presented as mean ± SD or mean (95% confidence interval). The significance of differences between 0 wks and 24 wks was assessed using Student's *t*-test. The significance of differences between continue and switch groups was assessed using unpaired *t*-test. \*\*\* *P* < 0.001 *vs* baseline. *P*-value: The significance of differences between switch from liraglutide and switch from dulaglutide, unpaired *t*-test.

Table S3. Relationships between changes in the fatty liver index and clinical parameters in the SWITCH group according to multiple linear regression analysis

|                                | <b>Regression coefficients</b> | <b>95% confidence interval</b> | <b>P-value</b> |
|--------------------------------|--------------------------------|--------------------------------|----------------|
| <b>Age</b>                     | −0.10                          | −0.16, 0.19                    | 0.569          |
| <b>Gender (female = 1)</b>     | 2.28                           | −1.57, 6.1                     | 0.234          |
| <b>Fatty liver index</b>       | 0.02                           | −0.16, 0.19                    | 0.855          |
| <b>Switch from dulaglutide</b> | 3.54                           | 0.16, 6.91                     | 0.041          |

Multiple linear regression was adjusted for age, gender (female = 1), baseline fatty liver index, and switch from dulaglutide.

Table S4. Comparison of baseline characteristics between switching from liraglutide and switching from dulaglutide in the SWITCH group

| Variables                            | Switch from Lira to Sema (n=13) | Switch from Dula to Sema (n=18) | P-value |
|--------------------------------------|---------------------------------|---------------------------------|---------|
| Age (years old)                      | 61.2 ± 12.4                     | 61.7 ± 13.4                     | 0.989   |
| Female sex, n (%)                    | 6 (46.2)                        | 6 (33.3)                        | 0.710   |
| Body mass index (kg/m <sup>2</sup> ) | 32.1 ± 6.2                      | 30.5 ± 4.9                      | 0.423   |
| Waist circumference (cm)             | 109.8 ± 10.3                    | 105.4 ± 11.6                    | 0.292   |
| HbA1c (%)                            | 8.0 ± 0.8                       | 7.9 ± 0.8                       | 0.876   |
| Triglyceride (mg/dL)                 | 111 (83-172)                    | 119 (80-165)                    | 0.508   |
| AST (IU/L)                           | 21 (21-28)                      | 22 (18-35)                      | 0.729   |
| ALT (IU/L)                           | 27 (19-33)                      | 29 (21-39)                      | 0.367   |
| γ-GTP (IU/L)                         | 21 (16-49)                      | 31 (20-46)                      | 0.458   |
| eGFR (mL/min/1.73m <sup>2</sup> )    | 67.4 ± 20.4                     | 75.1 ± 24.1                     | 0.358   |
| Fatty liver index                    | 71.2 ± 22.9                     | 66.6 ± 26.0                     | 0.614   |

Values are presented as mean ± SD, median (25-75 percentile), or number (%). *P*-value: The significance of differences between the groups, unpaired *t*-test, Mann-Whitney *U*-test, or Fisher's exact test. γ-GTP, γ-glutamyl transpeptidase; ALT, alanine aminotransferase; AST, aspartate aminotransferase; Dula, dulaglutide; eGFR, estimated glomerular filtration rate; HbA1c, glycated hemoglobin; Lira, liraglutide; Sema, semaglutide.

Table S5. MANOVA repeated measures results for fatty liver index.

| <b>Factors</b>                                                | <b>F value</b> | <b>P-value</b> |
|---------------------------------------------------------------|----------------|----------------|
| <b>Between subject</b>                                        |                |                |
| Treatment strategies (Continue GLP-RAs or switch to sema) (T) | 3.27           | 0.077          |
| Baseline GLP-1RA regimens (lira or dula) (B)                  | 0.27           | 0.608          |
| Age                                                           | 1.56           | 0.218          |
| BMI                                                           | 39.83          | < 0.001        |
| sBP                                                           | 2.38           | 0.130          |
| HbA1c                                                         | 4.96           | 0.031          |
| T*B                                                           | 0.47           | 0.495          |
| T*Age                                                         | 1.81           | 0.185          |
| T*BMI                                                         | 0.03           | 0.860          |
| T*sBP                                                         | 1.15           | 0.289          |
| T*HbA1c                                                       | 4.20           | 0.046          |
| <b>Within subject</b>                                         |                |                |
| Period*T                                                      | 4.15           | 0.048          |
| Period*B                                                      | 0.21           | 0.651          |
| Period*Age                                                    | 1.89           | 0.176          |
| Period*BMI                                                    | 0.00           | 1.000          |
| Period*sBP                                                    | 1.25           | 0.269          |
| Period*HbA1c                                                  | 0.14           | 0.714          |
| Period*T*B                                                    | 3.16           | 0.082          |
| Period*T*Age                                                  | 0.02           | 0.901          |
| Period*T*BMI                                                  | 0.28           | 0.602          |
| Period*T*sBP                                                  | 0.25           | 0.616          |
| Period*T*HbA1c                                                | 0.28           | 0.601          |

BMI, body mass index; dula, dulaglutide; GLP-1RA, glucagon like peptide receptor agonist; HbA1c, glycated hemoglobin; lira, liraglutide; sema, semaglutide.
